# Supplementary material for: A Study on the Slope Failure Monitoring of a Model Slope by the Application of a Displacement Sensor
Source: Hindawi journal article supplement (doi:10.1155/2019/7570517), 2019-12-21
Supplement: f1 [file 7570517.f1.zip]

Archive with 2 entries (2 files):
- Supplementary Files.docx
- Supplementary_Displacement Data.xlsx
