# Supplementary material for: A Study on the Slope Failure Monitoring of a Model Slope by the Application of a Displacement Sensor
Source: Hindawi journal article supplement (doi:10.1155/2019/7570517), 2019-12-21
Supplement: f1 [file 7570517.f1.zip › Supplementary Files.docx]

Supplementary files mentioned in the manuscript are given below.

**1.**

| 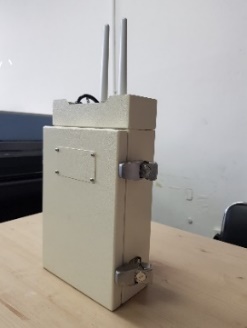 | CPU: ARM 32-bit Cortex-M4 CPU(120MHX);  Memory : 1MB FLASH, 128KB RAM;  Local Mesh Network (Up to 4 LoRa Mesh Modules);  Wireless Backhaul Uplink(1 FSK Mesh Module);  Wired Uplink (Ethernet:1 10/100 LAN; the console UART port can be used for uplink);  Console Port : TTL level UART @ 115200 baud;  Power : Input AC 100V~240V 0.5A, Output DC 5V 2A. |
| --- | --- |
| Gateway and its Specifications. | |

**2.**

Specifications of the IoT Client.

| **IoT Client** | **Specifications** |
| --- | --- |
| Operating temperature | -25 °C – 60 °C |
| IP Level  (Water and dust-proof) | IP65 |
| Power System | Solar cell panel 6 V, 70 mAh, 0.42W  LiFePO4 rechargeable battery pack (6400 mAh, 3.2 V) |
| MCU | STM32F051  ARM-based 32 bit MCU frequency up to 48 MHz |
| ADC | ADS1231 24 Bit Analogue-to-Digital Converter for bridge sensors |
| Communication module | LoRa Module 900 MHz Long Range Transceiver |
| S/W | OTA update function  Sleep mode function  System self-diagnostics function  Mesh network function |

P.S.: IP: Internet Protocol, MCU: Multipoint Control Unit, ADC: Analog-to-Digital Converter, S/W: Software, OTA: Over the Air

**3.**

| 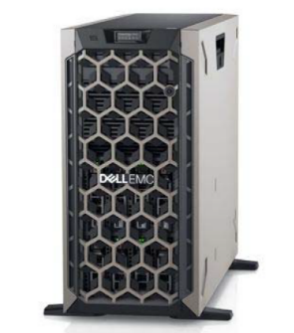 | Intel Xeon Bronze 3106 8Core 11MB Cache  16GB PC4-2400T Registered DIMM  1TB SATA 7.2k LFF Hot Plugged HDD x 2ea  750W FS Plat Hot Plug Power Supply Redundant  PERC H730p Controller, 2GB NV Cache  Slim DVD Writer  OS: LINUX  UPS 1000VA |
| --- | --- |

Dell PowerEdge T440 (IoT Server) and its specifications.
