# Supplementary material for: A Study on the Slope Failure Monitoring of a Model Slope by the Application of a Displacement Sensor
Source: Hindawi journal article supplement (doi:10.1155/2019/7570517), 2019-12-21
Supplement: f1 [file 7570517.f1.zip › Supplementary_Displacement Data.xlsx]

## Sheet: Displacement Data
time(min)	S1	Inverse of S1	S2
0	0	#DIV/0!	0
0.0166667	0	#DIV/0!	0
0.0333333	0	#DIV/0!	0
0.05	0	#DIV/0!	0
0.0666667	0	#DIV/0!	0
0.0833333	0	#DIV/0!	0
0.1	0	#DIV/0!	0
0.116667	0	#DIV/0!	0
0.133333	0	#DIV/0!	0
0.15	0	#DIV/0!	0
0.166667	0	#DIV/0!	0
0.183333	0	#DIV/0!	0
0.2	0	#DIV/0!	0
0.216667	0	#DIV/0!	0
0.233333	0	#DIV/0!	0
0.25	0	#DIV/0!	0
0.266667	0	#DIV/0!	0
0.283333	0	#DIV/0!	0
0.3	0	#DIV/0!	0
0.316667	0	#DIV/0!	0
0.333333	0	#DIV/0!	0
0.35	0	#DIV/0!	0
0.366667	0	#DIV/0!	0
0.383333	0	#DIV/0!	0
0.4	0	#DIV/0!	0
0.416667	0.1285	7.7821	-0.0078
0.433333	0.2056	4.86381	-0.0156
0.45	0.2313	4.32339	-0.0182
0.466667	0.1028	9.72763	-0.0104
0.483333	0.1028	9.72763	-0.0104
0.5	0.0257	38.9105	-0.0026
0.516667	0.0514	19.4553	-0.0052
0.533333	0.0514	19.4553	-0.0052
0.55	0.0514	19.4553	-0.0052
0.566667	0.0514	19.4553	-0.0052
0.583333	0.1285	7.7821	-0.0104
0.6	0.0257	38.9105	0.0026
0.616667	0.0257	38.9105	-0.0026
0.633333	0.0257	38.9105	0
0.65	0.0771	12.9702	0.0052
0.666667	0.0771	12.9702	0.0052
0.683333	0.0771	12.9702	0.0052
0.7	0.0514	19.4553	0.0052
0.716667	0.0514	19.4553	0.0052
0.733333	0.0514	19.4553	0.0052
0.75	0.0514	19.4553	0.0052
0.766667	0.0514	19.4553	0.0052
0.783333	0.0514	19.4553	0.0052
0.8	0.0514	19.4553	0.0052
0.816667	0.0514	19.4553	0.0052
0.833333	0.0514	19.4553	0.0052
0.85	0.0257	38.9105	0.0052
0.866667	0.0257	38.9105	0.0026
0.883333	0.0257	38.9105	0.0026
0.9	0.0257	38.9105	0.0026
0.916667	0.0257	38.9105	0.0026
0.933333	0.0257	38.9105	0.0026
0.95	0.0257	38.9105	0.0026
0.966667	0.0257	38.9105	0.0026
0.983333	0.0257	38.9105	0.0026
1	0.0257	38.9105	0.0026
1.01667	0.0257	38.9105	0.0026
1.03333	0.0257	38.9105	0.0026
1.05	0.0257	38.9105	0.0026
1.06667	0.0257	38.9105	0.0026
1.08333	0.0257	38.9105	0.0026
1.1	0.0257	38.9105	0.0026
1.11667	0.0257	38.9105	0.0026
1.13333	0.0257	38.9105	0.0026
1.15	0.0257	38.9105	0.0026
1.16667	0.0257	38.9105	0.0026
1.18333	0.0257	38.9105	0.0026
1.2	0.0257	38.9105	0.0026
1.21667	0.0257	38.9105	0.0026
1.23333	0.0514	19.4553	0.0026
1.25	0.0514	19.4553	0.0026
1.26667	0.0514	19.4553	0.0026
1.28333	0.0514	19.4553	0.0026
1.3	0.0514	19.4553	0.0026
1.31667	0.0514	19.4553	0.0026
1.33333	0.0514	19.4553	0.0026
1.35	0.0514	19.4553	0.0026
1.36667	0.0514	19.4553	0.0026
1.38333	0.0514	19.4553	0.0026
1.4	0.0514	19.4553	0.0026
1.41667	0.0514	19.4553	0.0026
1.43333	0.0514	19.4553	0.0026
1.45	0.0514	19.4553	0.0026
1.46667	0.0514	19.4553	0.0026
1.48333	0.0514	19.4553	0.0026
1.5	0.0514	19.4553	0.0026
1.51667	0.0514	19.4553	0.0026
1.53333	0.0514	19.4553	0.0026
1.55	0.0514	19.4553	0.0026
1.56667	0.0514	19.4553	0.0026
1.58333	0.0514	19.4553	0.0026
1.6	0.0514	19.4553	0.0026
1.61667	0.0514	19.4553	0.0026
1.63333	0.0514	19.4553	0.0026
1.65	0.0514	19.4553	0.0026
1.66667	0.0514	19.4553	0.0026
1.68333	0.0514	19.4553	0.0026
1.7	0.0514	19.4553	0.0026
1.71667	0.0514	19.4553	0.0026
1.73333	0.0514	19.4553	0.0026
1.75	0.0514	19.4553	0.0026
1.76667	0.0514	19.4553	0.0026
1.78333	0.0514	19.4553	0.0026
1.8	0.0514	19.4553	0.0026
1.81667	0.0514	19.4553	0.0026
1.83333	0.0514	19.4553	0.0026
1.85	0.0514	19.4553	0.0026
1.86667	0.0514	19.4553	0.0026
1.88333	0.0514	19.4553	0.0026
1.9	0.0514	19.4553	0.0026
1.91667	0.0514	19.4553	0.0026
1.93333	0.0514	19.4553	0.0026
1.95	0.0514	19.4553	0.0026
1.96667	0.0514	19.4553	0.0026
1.98333	0.0514	19.4553	0.0026
2	0.0514	19.4553	0.0026
2.01667	0.0514	19.4553	0.0026
2.03333	0.0514	19.4553	0.0026
2.05	0.0514	19.4553	0.0026
2.06667	0.0514	19.4553	0.0026
2.08333	0.0514	19.4553	0.0026
2.1	0.0514	19.4553	0.0026
2.11667	0.0514	19.4553	0.0026
2.13333	0.0514	19.4553	0.0026
2.15	0.0514	19.4553	0.0026
2.16667	0.0514	19.4553	0.0026
2.18333	0.0514	19.4553	0.0026
2.2	0.0514	19.4553	0.0026
2.21667	0.0514	19.4553	0.0026
2.23333	0.0514	19.4553	0.0026
2.25	0.0514	19.4553	0.0026
2.26667	0.0514	19.4553	0.0026
2.28333	0.0514	19.4553	0.0026
2.3	0.0514	19.4553	0.0026
2.31667	0.0514	19.4553	0.0052
2.33333	0.0514	19.4553	0.0026
2.35	0.0514	19.4553	0.0026
2.36667	0.0514	19.4553	0.0026
2.38333	0.0514	19.4553	0.0026
2.4	0.0514	19.4553	0.0026
2.41667	0.0514	19.4553	0.0026
2.43333	0.0514	19.4553	0.0026
2.45	0.0514	19.4553	0.0026
2.46667	0.0514	19.4553	0.0026
2.48333	0.0514	19.4553	0.0026
2.5	0.0514	19.4553	0.0026
2.51667	0.0514	19.4553	0.0026
2.53333	0.0514	19.4553	0.0026
2.55	0.0514	19.4553	0.0026
2.56667	0.0771	12.9702	0.0026
2.58333	0.0771	12.9702	0.0026
2.6	0.0771	12.9702	0.0026
2.61667	0.0771	12.9702	0.0026
2.63333	0.0771	12.9702	0.0026
2.65	0.0771	12.9702	0.0026
2.66667	0.0771	12.9702	0.0026
2.68333	0.0771	12.9702	0.0026
2.7	0.0771	12.9702	0.0026
2.71667	0.0771	12.9702	0.0026
2.73333	0.0771	12.9702	0.0026
2.75	0.0771	12.9702	0.0026
2.76667	0.0771	12.9702	0.0026
2.78333	0.0771	12.9702	0.0052
2.8	0.0771	12.9702	0.0026
2.81667	0.0771	12.9702	0.0026
2.83333	0.0771	12.9702	0.0026
2.85	0.0771	12.9702	0.0052
2.86667	0.0771	12.9702	0.0026
2.88333	0.1028	9.72763	0.0052
2.9	0.0771	12.9702	0.0026
2.91667	0.0771	12.9702	0.0026
2.93333	0.0771	12.9702	0.0026
2.95	0.0771	12.9702	0.0026
2.96667	0.1028	9.72763	0.0026
2.98333	0.1028	9.72763	0.0026
3	0.1028	9.72763	0.0026
3.01667	0.1028	9.72763	0.0026
3.03333	0.1028	9.72763	0.0026
3.05	0.0771	12.9702	0.0026
3.06667	0.1028	9.72763	0.0026
3.08333	0.0771	12.9702	0.0026
3.1	0.0771	12.9702	0.0026
3.11667	0.0771	12.9702	0.0052
3.13333	0.0771	12.9702	0.0052
3.15	0.0771	12.9702	0.0052
3.16667	0.0771	12.9702	0.0052
3.18333	0.0771	12.9702	0.0052
3.2	0.1028	9.72763	0.0052
3.21667	0.0771	12.9702	0.0052
3.23333	0.1028	9.72763	0.0052
3.25	0.1028	9.72763	0.0052
3.26667	0.1028	9.72763	0.0052
3.28333	0.1028	9.72763	0.0052
3.3	0.1028	9.72763	0.0052
3.31667	0.1028	9.72763	0.0052
3.33333	0.1028	9.72763	0.0052
3.35	0.1028	9.72763	0.0052
3.36667	0.1028	9.72763	0.0052
3.38333	0.1028	9.72763	0.0052
3.4	0.1028	9.72763	0.0052
3.41667	0.1028	9.72763	0.0052
3.43333	0.1028	9.72763	0.0052
3.45	0.1028	9.72763	0.0052
3.46667	0.1028	9.72763	0.0052
3.48333	0.1028	9.72763	0.0052
3.5	0.1028	9.72763	0.0052
3.51667	0.1028	9.72763	0.0052
3.53333	0.1028	9.72763	0.0052
3.55	0.1028	9.72763	0.0052
3.56667	0.1028	9.72763	0.0052
3.58333	0.1028	9.72763	0.0052
3.6	0.1028	9.72763	0.0052
3.61667	0.1028	9.72763	0.0052
3.63333	0.1028	9.72763	0.0052
3.65	0.1028	9.72763	0.0676
3.66667	0.1028	9.72763	0.1482
3.68333	0.1028	9.72763	0.2262
3.7	0.1028	9.72763	0.2236
3.71667	0.1028	9.72763	0.2678
3.73333	0.1028	9.72763	0.2288
3.75	0.1028	9.72763	0.2054
3.76667	0.1028	9.72763	0.1898
3.78333	0.1028	9.72763	0.2002
3.8	0.1028	9.72763	0.2002
3.81667	0.1028	9.72763	0.2002
3.83333	0.1028	9.72763	0.2002
3.85	0.1028	9.72763	0.2002
3.86667	0.1028	9.72763	0.2002
3.88333	0.1028	9.72763	0.2002
3.9	0.1028	9.72763	0.2002
3.91667	0.1028	9.72763	0.2002
3.93333	0.1028	9.72763	0.2002
3.95	0.1028	9.72763	0.2002
3.96667	0.1028	9.72763	0.2002
3.98333	0.1028	9.72763	0.2002
4	0.1028	9.72763	0.2002
4.01667	0.1028	9.72763	0.2028
4.03333	0.1285	7.7821	0.2028
4.05	0.1028	9.72763	0.2002
4.06667	0.1285	7.7821	0.2002
4.08333	0.1285	7.7821	0.2002
4.1	0.1285	7.7821	0.2002
4.11667	0.1285	7.7821	0.2002
4.13333	0.1285	7.7821	0.2028
4.15	0.1285	7.7821	0.2028
4.16667	0.1285	7.7821	0.2028
4.18333	0.1285	7.7821	0.2028
4.2	0.1285	7.7821	0.2028
4.21667	0.1028	9.72763	0.2028
4.23333	0.1028	9.72763	0.2028
4.25	0.1028	9.72763	0.2028
4.26667	0.1028	9.72763	0.2028
4.28333	0.1028	9.72763	0.2028
4.3	0.1028	9.72763	0.2028
4.31667	0.1028	9.72763	0.2028
4.33333	0.1028	9.72763	0.2028
4.35	0.1028	9.72763	0.2028
4.36667	0.1028	9.72763	0.2028
4.38333	0.1028	9.72763	0.2028
4.4	0.1028	9.72763	0.2028
4.41667	0.1028	9.72763	0.2028
4.43333	0.1028	9.72763	0.2028
4.45	0.1028	9.72763	0.2028
4.46667	0.1285	7.7821	0.2028
4.48333	0.1285	7.7821	0.2028
4.5	0.1028	9.72763	0.2028
4.51667	0.1285	7.7821	0.2028
4.53333	0.1285	7.7821	0.2028
4.55	0.1285	7.7821	0.2028
4.56667	0.1285	7.7821	0.2028
4.58333	0.1285	7.7821	0.2028
4.6	0.1285	7.7821	0.2028
4.61667	0.1285	7.7821	0.2028
4.63333	0.1285	7.7821	0.2028
4.65	0.1285	7.7821	0.2028
4.66667	0.1285	7.7821	0.2028
4.68333	0.1285	7.7821	0.2028
4.7	0.1285	7.7821	0.2028
4.71667	0.1285	7.7821	0.2028
4.73333	0.1285	7.7821	0.2028
4.75	0.1285	7.7821	0.2028
4.76667	0.1285	7.7821	0.2028
4.78333	0.1285	7.7821	0.2028
4.8	0.1285	7.7821	0.2028
4.81667	0.1285	7.7821	0.2028
4.83333	0.1285	7.7821	0.2028
4.85	0.1285	7.7821	0.2028
4.86667	0.1285	7.7821	0.2028
4.88333	0.1285	7.7821	0.2028
4.9	0.1285	7.7821	0.2028
4.91667	0.1285	7.7821	0.2028
4.93333	0.1285	7.7821	0.2028
4.95	0.1285	7.7821	0.2028
4.96667	0.1285	7.7821	0.2028
4.98333	0.1285	7.7821	0.2028
5	0.1285	7.7821	0.2028
5.01667	0.1285	7.7821	0.2028
5.03333	0.1285	7.7821	0.2028
5.05	0.1285	7.7821	0.2028
5.06667	0.1285	7.7821	0.2028
5.08333	0.1285	7.7821	0.2028
5.1	0.1285	7.7821	0.2028
5.11667	0.1285	7.7821	0.2028
5.13333	0.1285	7.7821	0.2028
5.15	0.1285	7.7821	0.2028
5.16667	0.1285	7.7821	0.2028
5.18333	0.1285	7.7821	0.2028
5.2	0.1285	7.7821	0.2028
5.21667	0.1285	7.7821	0.2028
5.23333	0.1285	7.7821	0.2028
5.25	0.1285	7.7821	0.2028
5.26667	0.1285	7.7821	0.2028
5.28333	0.1285	7.7821	0.2028
5.3	0.1542	6.48508	0.2028
5.31667	0.1285	7.7821	0.2028
5.33333	0.1285	7.7821	0.2028
5.35	0.1285	7.7821	0.2028
5.36667	0.1285	7.7821	0.2028
5.38333	0.1285	7.7821	0.2028
5.4	0.1542	6.48508	0.2028
5.41667	0.1285	7.7821	0.2028
5.43333	0.1542	6.48508	0.2028
5.45	0.1542	6.48508	0.2028
5.46667	0.1542	6.48508	0.2028
5.48333	0.1542	6.48508	0.2028
5.5	0.1542	6.48508	0.2028
5.51667	0.1542	6.48508	0.2028
5.53333	0.1542	6.48508	0.2028
5.55	0.1542	6.48508	0.2028
5.56667	0.1542	6.48508	0.2028
5.58333	0.1542	6.48508	0.2028
5.6	0.1542	6.48508	0.2028
5.61667	0.1542	6.48508	0.2028
5.63333	0.1542	6.48508	0.2028
5.65	0.1542	6.48508	0.2028
5.66667	0.1542	6.48508	0.2028
5.68333	0.1542	6.48508	0.2028
5.7	0.1542	6.48508	0.2028
5.71667	0.1542	6.48508	0.2028
5.73333	0.1542	6.48508	0.2028
5.75	0.1542	6.48508	0.2028
5.76667	0.1542	6.48508	0.2028
5.78333	0.1542	6.48508	0.2028
5.8	0.1542	6.48508	0.2028
5.81667	0.1542	6.48508	0.2028
5.83333	0.1542	6.48508	0.2028
5.85	0.1542	6.48508	0.2054
5.86667	0.1542	6.48508	0.2054
5.88333	0.1542	6.48508	0.2054
5.9	0.1542	6.48508	0.2054
5.91667	0.1542	6.48508	0.2054
5.93333	0.1542	6.48508	0.2028
5.95	0.1542	6.48508	0.2054
5.96667	0.1542	6.48508	0.2028
5.98333	0.1542	6.48508	0.2028
6	0.1542	6.48508	0.2028
6.01667	0.1542	6.48508	0.2054
6.03333	0.1542	6.48508	0.2054
6.05	0.1542	6.48508	0.2028
6.06667	0.1542	6.48508	0.2028
6.08333	0.1542	6.48508	0.2054
6.1	0.1542	6.48508	0.2054
6.11667	0.1542	6.48508	0.2028
6.13333	0.1542	6.48508	0.2054
6.15	0.1542	6.48508	0.2054
6.16667	0.1542	6.48508	0.2054
6.18333	0.1542	6.48508	0.2054
6.2	0.1542	6.48508	0.2054
6.21667	0.1542	6.48508	0.2054
6.23333	0.1542	6.48508	0.2054
6.25	0.1799	5.55864	0.2054
6.26667	0.1799	5.55864	0.2054
6.28333	0.1542	6.48508	0.2054
6.3	0.1799	5.55864	0.2054
6.31667	0.1799	5.55864	0.2054
6.33333	0.1799	5.55864	0.2054
6.35	0.1799	5.55864	0.2054
6.36667	0.1799	5.55864	0.2054
6.38333	0.1799	5.55864	0.2054
6.4	0.1799	5.55864	0.2054
6.41667	0.1799	5.55864	0.2054
6.43333	0.1799	5.55864	0.2054
6.45	0.1799	5.55864	0.2054
6.46667	0.1799	5.55864	0.2054
6.48333	0.1799	5.55864	0.2054
6.5	0.1799	5.55864	0.2054
6.51667	0.1799	5.55864	0.2054
6.53333	0.1799	5.55864	0.2054
6.55	0.1799	5.55864	0.2054
6.56667	0.1799	5.55864	0.2054
6.58333	0.1799	5.55864	0.2054
6.6	0.1799	5.55864	0.2054
6.61667	0.1799	5.55864	0.2054
6.63333	0.1799	5.55864	0.2054
6.65	0.1799	5.55864	0.2054
6.66667	0.1799	5.55864	0.2054
6.68333	0.1799	5.55864	0.2054
6.7	0.1799	5.55864	0.2054
6.71667	0.1799	5.55864	0.2054
6.73333	0.1799	5.55864	0.2054
6.75	0.1799	5.55864	0.2054
6.76667	0.1799	5.55864	0.2054
6.78333	0.1799	5.55864	0.2054
6.8	0.1799	5.55864	0.2054
6.81667	0.1799	5.55864	0.2054
6.83333	0.1799	5.55864	0.2054
6.85	0.1799	5.55864	0.2054
6.86667	0.1799	5.55864	0.2054
6.88333	0.1799	5.55864	0.2054
6.9	0.1799	5.55864	0.2054
6.91667	0.1799	5.55864	0.2054
6.93333	0.1799	5.55864	0.2054
6.95	0.1799	5.55864	0.2054
6.96667	0.1799	5.55864	0.2054
6.98333	0.1799	5.55864	0.2054
7	0.1799	5.55864	0.2054
7.01667	0.1799	5.55864	0.2054
7.03333	0.1799	5.55864	0.2054
7.05	0.1799	5.55864	0.2054
7.06667	0.1799	5.55864	0.2054
7.08333	0.1799	5.55864	0.2054
7.1	0.1799	5.55864	0.2054
7.11667	0.1799	5.55864	0.2054
7.13333	0.1799	5.55864	0.2054
7.15	0.1799	5.55864	0.208
7.16667	0.1799	5.55864	0.2054
7.18333	0.1799	5.55864	0.2054
7.2	0.1799	5.55864	0.2054
7.21667	0.1799	5.55864	0.2054
7.23333	0.1799	5.55864	0.2054
7.25	0.1799	5.55864	0.2054
7.26667	0.1799	5.55864	0.2054
7.28333	0.1799	5.55864	0.2054
7.3	0.1799	5.55864	0.2054
7.31667	0.1799	5.55864	0.2054
7.33333	0.1799	5.55864	0.2054
7.35	0.1799	5.55864	0.2054
7.36667	0.1799	5.55864	0.2054
7.38333	0.1799	5.55864	0.2054
7.4	0.1799	5.55864	0.2054
7.41667	0.1799	5.55864	0.2054
7.43333	0.1799	5.55864	0.2054
7.45	0.1799	5.55864	0.2054
7.46667	0.1799	5.55864	0.2054
7.48333	0.1799	5.55864	0.2054
7.5	0.1799	5.55864	0.2054
7.51667	0.1799	5.55864	0.2054
7.53333	0.1799	5.55864	0.2054
7.55	0.1799	5.55864	0.2054
7.56667	0.1799	5.55864	0.2054
7.58333	0.1799	5.55864	0.2054
7.6	0.1799	5.55864	0.2054
7.61667	0.1799	5.55864	0.2054
7.63333	0.1799	5.55864	0.2054
7.65	0.1799	5.55864	0.2054
7.66667	0.0257	38.9105	0.1924
7.68333	0.0257	38.9105	0.195
7.7	0.0771	12.9702	0.1976
7.71667	0.1028	9.72763	0.1976
7.73333	0.1028	9.72763	0.2002
7.75	0.1285	7.7821	0.2002
7.76667	0.1799	5.55864	0.2054
7.78333	0.2313	4.32339	0.208
7.8	0.2056	4.86381	0.2054
7.81667	0.1799	5.55864	0.2054
7.83333	0.2313	4.32339	0.208
7.85	0.2056	4.86381	0.208
7.86667	0.2056	4.86381	0.208
7.88333	0.2056	4.86381	0.208
7.9	0.2056	4.86381	0.208
7.91667	0.2056	4.86381	0.208
7.93333	0.2056	4.86381	0.208
7.95	0.2056	4.86381	0.208
7.96667	0.2056	4.86381	0.208
7.98333	0.2056	4.86381	0.208
8	0.2056	4.86381	0.208
8.01667	0.2056	4.86381	0.208
8.03333	0.2056	4.86381	0.208
8.05	0.2056	4.86381	0.208
8.06667	0.2056	4.86381	0.208
8.08333	0.2056	4.86381	0.208
8.1	0.2056	4.86381	0.208
8.11667	0.2056	4.86381	0.208
8.13333	0.2056	4.86381	0.208
8.15	0.2056	4.86381	0.208
8.16667	0.1285	7.7821	0.2028
8.18333	0.0257	38.9105	0.1924
8.2	0.0514	19.4553	0.195
8.21667	0.1028	9.72763	0.2002
8.23333	0.1028	9.72763	0.2002
8.25	0.1285	7.7821	0.2028
8.26667	0.1285	7.7821	0.2028
8.28333	0.1285	7.7821	0.2028
8.3	0.1542	6.48508	0.2028
8.31667	0.1542	6.48508	0.2028
8.33333	0.1542	6.48508	0.2028
8.35	0.1542	6.48508	0.2028
8.36667	0.1542	6.48508	0.2028
8.38333	0.1542	6.48508	0.2028
8.4	0.1542	6.48508	0.2054
8.41667	0.1799	5.55864	0.2054
8.43333	0.1799	5.55864	0.2054
8.45	0.1799	5.55864	0.2054
8.46667	0.1799	5.55864	0.2054
8.48333	0.1542	6.48508	0.2054
8.5	0.1799	5.55864	0.2054
8.51667	0.2056	4.86381	0.208
8.53333	0.257	3.89105	0.2132
8.55	0.257	3.89105	0.2106
8.56667	0.1285	7.7821	0.2002
8.58333	0.257	3.89105	0.2106
8.6	0.257	3.89105	0.2106
8.61667	0.257	3.89105	0.2106
8.63333	0.2313	4.32339	0.2106
8.65	0.2313	4.32339	0.2106
8.66667	0.2313	4.32339	0.2106
8.68333	0.2313	4.32339	0.2106
8.7	0.2313	4.32339	0.2106
8.71667	0.2313	4.32339	0.2106
8.73333	0.2313	4.32339	0.2106
8.75	0.2313	4.32339	0.2106
8.76667	0.2313	4.32339	0.2106
8.78333	0.2313	4.32339	0.2106
8.8	0.2056	4.86381	0.2106
8.81667	0.2056	4.86381	0.2106
8.83333	0.2056	4.86381	0.2106
8.85	0.2056	4.86381	0.208
8.86667	0.2056	4.86381	0.208
8.88333	0.2056	4.86381	0.208
8.9	0.2056	4.86381	0.208
8.91667	0.2056	4.86381	0.208
8.93333	0.2056	4.86381	0.208
8.95	0.2056	4.86381	0.208
8.96667	0.2056	4.86381	0.208
8.98333	0.2056	4.86381	0.208
9	0.2056	4.86381	0.208
9.01667	0.2056	4.86381	0.208
9.03333	0.2056	4.86381	0.208
9.05	0.2056	4.86381	0.208
9.06667	0.2056	4.86381	0.208
9.08333	0.2056	4.86381	0.208
9.1	0.2056	4.86381	0.208
9.11667	0.2056	4.86381	0.208
9.13333	0.2056	4.86381	0.208
9.15	0.2056	4.86381	0.208
9.16667	0.2056	4.86381	0.208
9.18333	0.2056	4.86381	0.208
9.2	0.2056	4.86381	0.208
9.21667	0.2056	4.86381	0.208
9.23333	0.2056	4.86381	0.208
9.25	0.2056	4.86381	0.208
9.26667	0.2056	4.86381	0.208
9.28333	0.2056	4.86381	0.208
9.3	0.2056	4.86381	0.208
9.31667	0.2056	4.86381	0.208
9.33333	0.2056	4.86381	0.208
9.35	0.2056	4.86381	0.208
9.36667	0.2056	4.86381	0.208
9.38333	0.2056	4.86381	0.208
9.4	0.2056	4.86381	0.208
9.41667	0.2056	4.86381	0.208
9.43333	0.2056	4.86381	0.208
9.45	0.2056	4.86381	0.208
9.46667	0.2056	4.86381	0.208
9.48333	0.2056	4.86381	0.208
9.5	0.2056	4.86381	0.208
9.51667	0.2056	4.86381	0.208
9.53333	0.2056	4.86381	0.208
9.55	0.2056	4.86381	0.208
9.56667	0.2056	4.86381	0.208
9.58333	0.2056	4.86381	0.208
9.6	0.2056	4.86381	0.208
9.61667	0.2056	4.86381	0.208
9.63333	0.2056	4.86381	0.208
9.65	0.2056	4.86381	0.208
9.66667	0.2056	4.86381	0.208
9.68333	0.2056	4.86381	0.208
9.7	0.2056	4.86381	0.208
9.71667	0.2056	4.86381	0.208
9.73333	0.2056	4.86381	0.208
9.75	0.2056	4.86381	0.208
9.76667	0.2056	4.86381	0.208
9.78333	0.2056	4.86381	0.208
9.8	0.2056	4.86381	0.208
9.81667	0.1799	5.55864	0.208
9.83333	0.1799	5.55864	0.208
9.85	0.1799	5.55864	0.208
9.86667	0.1799	5.55864	0.208
9.88333	0.1799	5.55864	0.208
9.9	0.2056	4.86381	0.208
9.91667	0.2056	4.86381	0.208
9.93333	0.2056	4.86381	0.2054
9.95	0.1799	5.55864	0.2054
9.96667	0.2056	4.86381	0.208
9.98333	0.1799	5.55864	0.208
10	0.1799	5.55864	0.208
10.0167	0.2056	4.86381	0.208
10.0333	0.1799	5.55864	0.208
10.05	0.1799	5.55864	0.2054
10.0667	0.1799	5.55864	0.2054
10.0833	0.1799	5.55864	0.2054
10.1	0.1799	5.55864	0.2054
10.1167	0.1799	5.55864	0.2054
10.1333	0.1799	5.55864	0.2054
10.15	0.1799	5.55864	0.2054
10.1667	0.1799	5.55864	0.2054
10.1833	0.1799	5.55864	0.2054
10.2	0.1799	5.55864	0.2054
10.2167	0.1799	5.55864	0.2054
10.2333	0.1799	5.55864	0.2054
10.25	0.1799	5.55864	0.2054
10.2667	0.1799	5.55864	0.2054
10.2833	0.1799	5.55864	0.2054
10.3	0.1799	5.55864	0.2054
10.3167	0.1799	5.55864	0.2054
10.3333	0.1799	5.55864	0.2054
10.35	0.1799	5.55864	0.2054
10.3667	0.1799	5.55864	0.2054
10.3833	0.1799	5.55864	0.2054
10.4	0.1799	5.55864	0.2054
10.4167	0.1799	5.55864	0.2054
10.4333	0.1799	5.55864	0.2054
10.45	0.1799	5.55864	0.2028
10.4667	0.1799	5.55864	0.2028
10.4833	0.1799	5.55864	0.2028
10.5	0.1799	5.55864	0.2028
10.5167	0.1799	5.55864	0.2028
10.5333	0.1799	5.55864	0.2028
10.55	0.1799	5.55864	0.2028
10.5667	0.1799	5.55864	0.2028
10.5833	0.1799	5.55864	0.2028
10.6	0.1799	5.55864	0.2028
10.6167	0.1799	5.55864	0.2028
10.6333	0.1799	5.55864	0.2028
10.65	0.1799	5.55864	0.2028
10.6667	0.1799	5.55864	0.2028
10.6833	0.1799	5.55864	0.2028
10.7	0.1799	5.55864	0.2028
10.7167	0.1799	5.55864	0.2028
10.7333	0.1542	6.48508	0.2002
10.75	0.1542	6.48508	0.2002
10.7667	0.1542	6.48508	0.2002
10.7833	0.1542	6.48508	0.2002
10.8	0.1542	6.48508	0.2002
10.8167	0.1542	6.48508	0.2002
10.8333	0.1542	6.48508	0.2002
10.85	0.1542	6.48508	0.2002
10.8667	0.1542	6.48508	0.1976
10.8833	0.1542	6.48508	0.1976
10.9	0.1542	6.48508	0.1976
10.9167	0.1542	6.48508	0.1976
10.9333	0.1542	6.48508	0.1976
10.95	0.1542	6.48508	0.1976
10.9667	0.1542	6.48508	0.1976
10.9833	0.1542	6.48508	0.1976
11	0.1542	6.48508	0.1976
11.0167	0.1285	7.7821	0.1976
11.0333	0.1285	7.7821	0.1976
11.05	0.1285	7.7821	0.1976
11.0667	0.1285	7.7821	0.1976
11.0833	0.1542	6.48508	0.1976
11.1	0.1285	7.7821	0.1976
11.1167	0.1285	7.7821	0.1976
11.1333	0.1285	7.7821	0.1976
11.15	0.1285	7.7821	0.195
11.1667	0.1285	7.7821	0.195
11.1833	0.1285	7.7821	0.195
11.2	0.1285	7.7821	0.195
11.2167	0.1285	7.7821	0.195
11.2333	0.1285	7.7821	0.195
11.25	0.1285	7.7821	0.195
11.2667	0.1285	7.7821	0.195
11.2833	0.1285	7.7821	0.195
11.3	0.1285	7.7821	0.195
11.3167	0.1285	7.7821	0.195
11.3333	0.1285	7.7821	0.195
11.35	0.1285	7.7821	0.195
11.3667	0.1285	7.7821	0.195
11.3833	0.1285	7.7821	0.195
11.4	0.1285	7.7821	0.195
11.4167	0.1285	7.7821	0.195
11.4333	0.1285	7.7821	0.195
11.45	0.1285	7.7821	0.195
11.4667	0.1285	7.7821	0.195
11.4833	0.1285	7.7821	0.195
11.5	0.1285	7.7821	0.195
11.5167	0.1285	7.7821	0.195
11.5333	0.1285	7.7821	0.195
11.55	0.1285	7.7821	0.1924
11.5667	0.1285	7.7821	0.1924
11.5833	0.1285	7.7821	0.1924
11.6	0.1285	7.7821	0.1924
11.6167	0.1285	7.7821	0.1924
11.6333	0.1285	7.7821	0.1924
11.65	0.1285	7.7821	0.1924
11.6667	0.1285	7.7821	0.1924
11.6833	0.1285	7.7821	0.1924
11.7	0.1285	7.7821	0.1924
11.7167	0.1285	7.7821	0.1924
11.7333	0.1285	7.7821	0.1924
11.75	0.1285	7.7821	0.1924
11.7667	0.1028	9.72763	0.1924
11.7833	0.1028	9.72763	0.1924
11.8	0.1028	9.72763	0.1924
11.8167	0.1285	7.7821	0.1924
11.8333	0.1285	7.7821	0.1924
11.85	0.1028	9.72763	0.1924
11.8667	0.1028	9.72763	0.1924
11.8833	0.1028	9.72763	0.1924
11.9	0.1028	9.72763	0.1924
11.9167	0.1028	9.72763	0.1924
11.9333	0.1028	9.72763	0.1924
11.95	0.1028	9.72763	0.1924
11.9667	0.1028	9.72763	0.1924
11.9833	0.1028	9.72763	0.1924
12	0.1028	9.72763	0.1924
12.0167	0.1028	9.72763	0.1924
12.0333	0.1028	9.72763	0.1898
12.05	0.1028	9.72763	0.1924
12.0667	0.1028	9.72763	0.1924
12.0833	0.1028	9.72763	0.1924
12.1	0.1028	9.72763	0.1924
12.1167	0.1028	9.72763	0.1924
12.1333	0.1028	9.72763	0.1924
12.15	0.1028	9.72763	0.1898
12.1667	0.1028	9.72763	0.1898
12.1833	0.1028	9.72763	0.1898
12.2	0.1028	9.72763	0.1898
12.2167	0.1028	9.72763	0.1898
12.2333	0.1028	9.72763	0.1716
12.25	0.0514	19.4553	0.1794
12.2667	0.0514	19.4553	0.182
12.2833	0.0257	38.9105	0.1846
12.3	0.0514	19.4553	0.1846
12.3167	0.0514	19.4553	0.1846
12.3333	0.0514	19.4553	0.1872
12.35	0.0514	19.4553	0.1872
12.3667	0.0514	19.4553	0.1872
12.3833	0.0514	19.4553	0.1872
12.4	0.0514	19.4553	0.1872
12.4167	0.1542	6.48508	0.195
12.4333	0.1542	6.48508	0.195
12.45	0.1285	7.7821	0.1924
12.4667	0.1028	9.72763	0.1898
12.4833	0.1028	9.72763	0.1898
12.5	0.1285	7.7821	0.1924
12.5167	0.1285	7.7821	0.1924
12.5333	0.1285	7.7821	0.1924
12.55	0.1285	7.7821	0.1924
12.5667	0.1285	7.7821	0.1924
12.5833	0.1285	7.7821	0.1924
12.6	0.1285	7.7821	0.1898
12.6167	0.1028	9.72763	0.1898
12.6333	0.1028	9.72763	0.1924
12.65	0.1028	9.72763	0.1898
12.6667	0.1028	9.72763	0.1898
12.6833	0.1028	9.72763	0.1898
12.7	0.1028	9.72763	0.1898
12.7167	0.1028	9.72763	0.1898
12.7333	0.1028	9.72763	0.1898
12.75	0.1028	9.72763	0.1898
12.7667	0.1028	9.72763	0.1898
12.7833	0.1028	9.72763	0.1898
12.8	0.1028	9.72763	0.1898
12.8167	0.1028	9.72763	0.1898
12.8333	0.1028	9.72763	0.1898
12.85	0.1028	9.72763	0.1898
12.8667	0.1028	9.72763	0.1898
12.8833	0.1028	9.72763	0.1898
12.9	0.1028	9.72763	0.1898
12.9167	0.1028	9.72763	0.1898
12.9333	0.1028	9.72763	0.1898
12.95	0.1028	9.72763	0.1898
12.9667	0.1028	9.72763	0.1898
12.9833	0.1028	9.72763	0.1898
13	0.1028	9.72763	0.1898
13.0167	0.1028	9.72763	0.1898
13.0333	0.1028	9.72763	0.1898
13.05	0.1028	9.72763	0.1898
13.0667	0.1028	9.72763	0.1898
13.0833	0.1028	9.72763	0.1898
13.1	0.1028	9.72763	0.1898
13.1167	0.1028	9.72763	0.1898
13.1333	0.1028	9.72763	0.1898
13.15	0.1028	9.72763	0.1898
13.1667	0.1028	9.72763	0.1898
13.1833	0.0771	12.9702	0.1898
13.2	0.1028	9.72763	0.1898
13.2167	0.1028	9.72763	0.1872
13.2333	0.1028	9.72763	0.1872
13.25	0.0771	12.9702	0.1872
13.2667	0.0771	12.9702	0.1872
13.2833	0.0771	12.9702	0.1872
13.3	0.1028	9.72763	0.1898
13.3167	0.0771	12.9702	0.1872
13.3333	0.0771	12.9702	0.1872
13.35	0.0771	12.9702	0.1898
13.3667	0.0771	12.9702	0.1872
13.3833	0.1028	9.72763	0.1872
13.4	0.1028	9.72763	0.1872
13.4167	0.1028	9.72763	0.1872
13.4333	0.1028	9.72763	0.1872
13.45	0.1028	9.72763	0.1872
13.4667	0.1028	9.72763	0.1872
13.4833	0.0771	12.9702	0.1872
13.5	0.0771	12.9702	0.1872
13.5167	0.1028	9.72763	0.1872
13.5333	0.0771	12.9702	0.1872
13.55	0.0771	12.9702	0.1872
13.5667	0.0771	12.9702	0.1872
13.5833	0.0771	12.9702	0.1872
13.6	0.0771	12.9702	0.1872
13.6167	0.0771	12.9702	0.1872
13.6333	0.0771	12.9702	0.1872
13.65	0.0771	12.9702	0.1872
13.6667	0.0771	12.9702	0.1872
13.6833	0.0771	12.9702	0.1872
13.7	0.1028	9.72763	0.169
13.7167	0.0257	38.9105	0.1768
13.7333	0.0268	37.3134	0.1794
13.75	0.0289	34.6021	0.1794
13.7667	0.0257	38.9105	0.1794
13.7833	0.0257	38.9105	0.182
13.8	0.0514	19.4553	0.182
13.8167	0.0257	38.9105	0.182
13.8333	0.0257	38.9105	0.182
13.85	0.0257	38.9105	0.182
13.8667	0.0257	38.9105	0.182
13.8833	0.1028	9.72763	0.1872
13.9	0.1285	7.7821	0.1898
13.9167	0.1028	9.72763	0.1898
13.9333	0.1028	9.72763	0.1898
13.95	0.1028	9.72763	0.1872
13.9667	0.1028	9.72763	0.1872
13.9833	0.1028	9.72763	0.1872
14	0.1028	9.72763	0.1872
14.0167	0.1028	9.72763	0.1872
14.0333	0.1028	9.72763	0.1872
14.05	0.1028	9.72763	0.1872
14.0667	0.1028	9.72763	0.1872
14.0833	0.1028	9.72763	0.1872
14.1	0.1028	9.72763	0.1872
14.1167	0.1028	9.72763	0.1872
14.1333	0.1028	9.72763	0.1872
14.15	0.1028	9.72763	0.1872
14.1667	0.1028	9.72763	0.1872
14.1833	0.1028	9.72763	0.1872
14.2	0.1028	9.72763	0.1872
14.2167	0.1028	9.72763	0.1872
14.2333	0.0771	12.9702	0.1872
14.25	0.1028	9.72763	0.1872
14.2667	0.1028	9.72763	0.1872
14.2833	0.1028	9.72763	0.1872
14.3	0.1028	9.72763	0.1872
14.3167	0.1028	9.72763	0.1872
14.3333	0.1028	9.72763	0.1872
14.35	0.1028	9.72763	0.1872
14.3667	0.1028	9.72763	0.1846
14.3833	0.0771	12.9702	0.1846
14.4	0.0771	12.9702	0.1872
14.4167	0.1028	9.72763	0.1846
14.4333	0.1028	9.72763	0.1872
14.45	0.0771	12.9702	0.1872
14.4667	0.1028	9.72763	0.1872
14.4833	0.0771	12.9702	0.1872
14.5	0.0771	12.9702	0.1846
14.5167	0.0771	12.9702	0.1872
14.5333	0.0771	12.9702	0.1846
14.55	0.0771	12.9702	0.1846
14.5667	0.0771	12.9702	0.1846
14.5833	0.0771	12.9702	0.1846
14.6	0.0771	12.9702	0.1846
14.6167	0.0771	12.9702	0.1846
14.6333	0.0771	12.9702	0.1846
14.65	0.0771	12.9702	0.1846
14.6667	0.0771	12.9702	0.1846
14.6833	0.0771	12.9702	0.1846
14.7	0.0771	12.9702	0.1846
14.7167	0.0771	12.9702	0.1846
14.7333	0.0771	12.9702	0.1846
14.75	0.0771	12.9702	0.1846
14.7667	0.0771	12.9702	0.1846
14.7833	0.0771	12.9702	0.1846
14.8	0.0771	12.9702	0.1846
14.8167	0.0771	12.9702	0.1846
14.8333	0.0771	12.9702	0.1846
14.85	0.0771	12.9702	0.1846
14.8667	0.0771	12.9702	0.1846
14.8833	0.0771	12.9702	0.1846
14.9	0.0771	12.9702	0.1846
14.9167	0.0771	12.9702	0.1846
14.9333	0.0771	12.9702	0.1846
14.95	0.1028	9.72763	0.1846
14.9667	0.1028	9.72763	0.1846
14.9833	0.1028	9.72763	0.1846
15	0.1028	9.72763	0.1846
15.0167	0.0771	12.9702	0.1846
15.0333	0.0771	12.9702	0.1846
15.05	0.0771	12.9702	0.1846
15.0667	0.0771	12.9702	0.1846
15.0833	0.1028	9.72763	0.1846
15.1	0.0771	12.9702	0.1846
15.1167	0.0771	12.9702	0.1846
15.1333	0.1028	9.72763	0.1846
15.15	0.1028	9.72763	0.1846
15.1667	0.1132	8.83392	0.1846
15.1833	0.1132	8.83392	0.1846
15.2	0.1133	8.82613	0.1846
15.2167	0.1028	9.72763	0.1846
15.2333	0.1028	9.72763	0.1846
15.25	0.1028	9.72763	0.1846
15.2667	0.1028	9.72763	0.1846
15.2833	0.1028	9.72763	0.1846
15.3	0.1028	9.72763	0.1846
15.3167	0.1028	9.72763	0.1846
15.3333	0.1028	9.72763	0.1846
15.35	0.1028	9.72763	0.1846
15.3667	0.1028	9.72763	0.1846
15.3833	0.1028	9.72763	0.1846
15.4	0.1028	9.72763	0.1846
15.4167	0.1028	9.72763	0.1846
15.4333	0.1028	9.72763	0.1846
15.45	0.1028	9.72763	0.1846
15.4667	0.1028	9.72763	0.1846
15.4833	0.1028	9.72763	0.1846
15.5	0.1028	9.72763	0.1846
15.5167	0.1028	9.72763	0.1846
15.5333	0.1028	9.72763	0.1846
15.55	0.1285	7.7821	0.1846
15.5667	0.1285	7.7821	0.1846
15.5833	0.1285	7.7821	0.1846
15.6	0.1285	7.7821	0.1846
15.6167	0.1285	7.7821	0.1846
15.6333	0.1285	7.7821	0.1846
15.65	0.1285	7.7821	0.1846
15.6667	0.1285	7.7821	0.1846
15.6833	0.1285	7.7821	0.1846
15.7	0.1285	7.7821	0.1846
15.7167	0.1285	7.7821	0.1846
15.7333	0.1285	7.7821	0.1846
15.75	0.1285	7.7821	0.1846
15.7667	0.1542	6.48508	0.1846
15.7833	0.1285	7.7821	0.1846
15.8	0.1542	6.48508	0.1846
15.8167	0.1542	6.48508	0.1846
15.8333	0.1542	6.48508	0.182
15.85	0.1542	6.48508	0.1846
15.8667	0.1542	6.48508	0.1846
15.8833	0.1542	6.48508	0.1846
15.9	0.1542	6.48508	0.1846
15.9167	0.1542	6.48508	0.182
15.9333	0.1542	6.48508	0.182
15.95	0.1542	6.48508	0.182
15.9667	0.1542	6.48508	0.182
15.9833	0.1542	6.48508	0.182
16	0.1542	6.48508	0.182
16.0167	0.1542	6.48508	0.182
16.0333	0.1542	6.48508	0.182
16.05	0.1542	6.48508	0.182
16.0667	0.1542	6.48508	0.182
16.0833	0.1542	6.48508	0.182
16.1	0.1542	6.48508	0.182
16.1167	0.1542	6.48508	0.182
16.1333	0.1542	6.48508	0.182
16.15	0.1542	6.48508	0.182
16.1667	0.1799	5.55864	0.182
16.1833	0.1799	5.55864	0.1846
16.2	0.1799	5.55864	0.1846
16.2167	0.1799	5.55864	0.1846
16.2333	0.1799	5.55864	0.1846
16.25	0.1799	5.55864	0.1846
16.2667	0.1824	5.48246	0.182
16.2833	0.18364	5.44544	0.182
16.3	0.197334	5.06755	0.182
16.3167	0.2435	4.10678	0.182
16.3333	0.2548	3.92465	0.182
16.35	0.26	3.84615	0.182
16.3667	0.2687	3.72162	0.182
16.3833	0.2874	3.47947	0.1846
16.4	0.3014	3.31785	0.1846
16.4167	0.3124	3.20102	0.1846
16.4333	0.36544	2.73643	0.182
16.45	0.3655	2.73598	0.182
16.4667	0.3674	2.72183	0.182
16.4833	0.3684	2.71444	0.182
16.5	0.3699	2.70343	0.182
16.5167	0.3701	2.70197	0.182
16.5333	0.3764	2.65675	0.182
16.55	0.3846	2.6001	0.182
16.5667	0.39541	2.52902	0.182
16.5833	0.4014	2.49128	0.182
16.6	0.4134	2.41896	0.182
16.6167	0.4234	2.36183	0.182
16.6333	0.324	3.08642	0.182
16.65	0.3642	2.74574	0.182
16.6667	0.3654	2.73673	0.182
16.6833	0.3724	2.68528	0.182
16.7	0.3846	2.6001	0.182
16.7167	0.4	2.5	0.182
16.7333	0.51	1.96078	0.182
16.75	0.314	3.18471	0.182
16.7667	0.3598	2.77932	0.182
16.7833	0.257	3.89105	0.182
16.8	0.2827	3.53732	0.182
16.8167	0.2827	3.53732	0.182
16.8333	0.4112	2.43191	0.182
16.85	0.3084	3.24254	0.182
16.8667	0.257	3.89105	0.182
16.8833	0.2313	4.32339	0.182
16.9	0.2313	4.32339	0.182
16.9167	0.2313	4.32339	0.182
16.9333	0.2827	3.53732	0.182
16.95	0.3341	2.99312	0.182
16.9667	0.3341	2.99312	0.182
16.9833	0.3341	2.99312	0.182
17	0.3598	2.77932	0.182
17.0167	0.3598	2.77932	0.182
17.0333	0.3855	2.59403	0.182
17.05	0.3855	2.59403	0.182
17.0667	0.4112	2.43191	0.182
17.0833	0.4112	2.43191	0.182
17.1	0.4369	2.28885	0.182
17.1167	0.4369	2.28885	0.182
17.1333	0.4369	2.28885	0.182
17.15	0.4626	2.16169	0.182
17.1667	0.4883	2.04792	0.182
17.1833	0.4883	2.04792	0.182
17.2	0.4883	2.04792	0.182
17.2167	0.4883	2.04792	0.182
17.2333	0.4883	2.04792	0.182
17.25	0.4883	2.04792	0.182
17.2667	0.4883	2.04792	0.182
17.2833	0.4883	2.04792	0.182
17.3	0.514	1.94553	0.182
17.3167	0.514	1.94553	0.182
17.3333	0.514	1.94553	0.182
17.35	0.514	1.94553	0.182
17.3667	0.5397	1.85288	0.182
17.3833	0.5397	1.85288	0.182
17.4	0.5654	1.76866	0.182
17.4167	0.5654	1.76866	0.182
17.4333	0.5654	1.76866	0.182
17.45	0.5654	1.76866	0.182
17.4667	0.5911	1.69176	0.182
17.4833	0.5911	1.69176	0.182
17.5	0.6168	1.62127	0.182
17.5167	0.6168	1.62127	0.182
17.5333	0.6168	1.62127	0.182
17.55	0.6425	1.55642	0.182
17.5667	0.6425	1.55642	0.182
17.5833	0.6682	1.49656	0.182
17.6	0.6682	1.49656	0.182
17.6167	0.6682	1.49656	0.182
17.6333	0.6939	1.44113	0.182
17.65	0.6939	1.44113	0.182
17.6667	0.7196	1.38966	0.182
17.6833	0.7196	1.38966	0.182
17.7	0.7196	1.38966	0.182
17.7167	0.7196	1.38966	0.182
17.7333	0.7453	1.34174	0.182
17.75	0.7196	1.38966	0.182
17.7667	0.7196	1.38966	0.182
17.7833	0.7196	1.38966	0.182
17.8	0.7453	1.34174	0.182
17.8167	0.7453	1.34174	0.182
17.8333	0.7453	1.34174	0.182
17.85	0.7453	1.34174	0.182
17.8667	0.7453	1.34174	0.182
17.8833	0.771	1.29702	0.182
17.9	0.771	1.29702	0.182
17.9167	0.771	1.29702	0.182
17.9333	0.771	1.29702	0.182
17.95	0.7967	1.25518	0.182
17.9667	0.7967	1.25518	0.182
17.9833	0.7967	1.25518	0.182
18	0.7967	1.25518	0.182
18.0167	0.7967	1.25518	0.182
18.0333	0.7967	1.25518	0.182
18.05	0.7967	1.25518	0.182
18.0667	0.8738	1.14443	0.1768
18.0833	0.9766	1.02396	0.1664
18.1	0.9252	1.08085	0.1716
18.1167	0.8995	1.11173	0.1742
18.1333	0.8224	1.21595	0.1794
18.15	0.8995	1.11173	0.1742
18.1667	0.8995	1.11173	0.1742
18.1833	0.8481	1.17911	0.1794
18.2	0.7967	1.25518	0.1846
18.2167	0.8224	1.21595	0.1846
18.2333	0.8224	1.21595	0.1846
18.25	0.8224	1.21595	0.182
18.2667	0.8224	1.21595	0.182
18.2833	0.8224	1.21595	0.182
18.3	0.8481	1.17911	0.182
18.3167	0.8481	1.17911	0.182
18.3333	0.8481	1.17911	0.182
18.35	0.8481	1.17911	0.182
18.3667	0.8481	1.17911	0.182
18.3833	0.8481	1.17911	0.182
18.4	0.8738	1.14443	0.182
18.4167	0.8738	1.14443	0.182
18.4333	0.8738	1.14443	0.182
18.45	0.8738	1.14443	0.182
18.4667	0.8738	1.14443	0.182
18.4833	0.8738	1.14443	0.182
18.5	0.8738	1.14443	0.182
18.5167	0.8738	1.14443	0.182
18.5333	0.8738	1.14443	0.182
18.55	0.8995	1.11173	0.182
18.5667	0.8738	1.14443	0.182
18.5833	0.8995	1.11173	0.182
18.6	0.8995	1.11173	0.182
18.6167	0.8995	1.11173	0.182
18.6333	0.8995	1.11173	0.182
18.65	0.8995	1.11173	0.182
18.6667	0.8995	1.11173	0.182
18.6833	0.8995	1.11173	0.1794
18.7	0.8995	1.11173	0.1794
18.7167	0.8995	1.11173	0.182
18.7333	0.8995	1.11173	0.182
18.75	0.8995	1.11173	0.182
18.7667	0.8995	1.11173	0.182
18.7833	0.8995	1.11173	0.182
18.8	0.8995	1.11173	0.182
18.8167	0.8738	1.14443	0.182
18.8333	0.8738	1.14443	0.1794
18.85	0.8995	1.11173	0.1794
18.8667	1.0537	0.949037	0.1664
18.8833	0.9766	1.02396	0.1742
18.9	0.9766	1.02396	0.1716
18.9167	0.9766	1.02396	0.1716
18.9333	0.8995	1.11173	0.1794
18.95	0.9252	1.08085	0.1768
18.9667	0.9252	1.08085	0.1768
18.9833	0.8738	1.14443	0.1794
19	0.8995	1.11173	0.1794
19.0167	0.8481	1.17911	0.1846
19.0333	0.8481	1.17911	0.1846
19.05	0.8481	1.17911	0.1846
19.0667	0.8481	1.17911	0.1846
19.0833	0.8481	1.17911	0.182
19.1	0.8481	1.17911	0.182
19.1167	0.8738	1.14443	0.182
19.1333	0.8481	1.17911	0.182
19.15	0.8738	1.14443	0.182
19.1667	0.8738	1.14443	0.182
19.1833	0.8738	1.14443	0.182
19.2	0.8738	1.14443	0.182
19.2167	0.8738	1.14443	0.182
19.2333	0.8738	1.14443	0.182
19.25	0.8738	1.14443	0.182
19.2667	0.8738	1.14443	0.182
19.2833	0.8738	1.14443	0.182
19.3	0.8738	1.14443	0.1794
19.3167	0.8738	1.14443	0.182
19.3333	0.8738	1.14443	0.1794
19.35	0.8738	1.14443	0.1794
19.3667	0.8738	1.14443	0.1794
19.3833	0.8738	1.14443	0.1794
19.4	0.8738	1.14443	0.1794
19.4167	0.8738	1.14443	0.1794
19.4333	0.8738	1.14443	0.1794
19.45	0.8738	1.14443	0.1794
19.4667	0.8738	1.14443	0.1794
19.4833	0.8738	1.14443	0.1794
19.5	0.8738	1.14443	0.1794
19.5167	0.8738	1.14443	0.1794
19.5333	0.8738	1.14443	0.1794
19.55	0.8738	1.14443	0.1794
19.5667	0.8738	1.14443	0.1794
19.5833	0.8738	1.14443	0.1794
19.6	0.8738	1.14443	0.1768
19.6167	0.8738	1.14443	0.1768
19.6333	0.8738	1.14443	0.1768
19.65	0.8738	1.14443	0.1768
19.6667	0.8738	1.14443	0.1768
19.6833	0.8738	1.14443	0.1768
19.7	0.8738	1.14443	0.1768
19.7167	0.8738	1.14443	0.1768
19.7333	0.8738	1.14443	0.1768
19.75	0.8738	1.14443	0.1768
19.7667	0.8738	1.14443	0.1768
19.7833	0.8738	1.14443	0.1742
19.8	0.8738	1.14443	0.1742
19.8167	0.8738	1.14443	0.1742
19.8333	0.8738	1.14443	0.1742
19.85	0.8738	1.14443	0.1742
19.8667	0.8738	1.14443	0.1742
19.8833	0.8738	1.14443	0.1742
19.9	0.8738	1.14443	0.1742
19.9167	0.8738	1.14443	0.1742
19.9333	0.8738	1.14443	0.1742
19.95	0.8995	1.11173	0.1716
19.9667	0.8995	1.11173	0.1716
19.9833	0.8995	1.11173	0.1716
20	0.8995	1.11173	0.1716
20.0167	0.8995	1.11173	0.1716
20.0333	0.8995	1.11173	0.1716
20.05	0.8995	1.11173	0.1716
20.0667	0.9252	1.08085	0.1716
20.0833	0.9252	1.08085	0.1716
20.1	0.9252	1.08085	0.1716
20.1167	0.9252	1.08085	0.1716
20.1333	0.9252	1.08085	0.1716
20.15	0.9252	1.08085	0.169
20.1667	0.9252	1.08085	0.169
20.1833	0.9252	1.08085	0.169
20.2	0.9252	1.08085	0.169
20.2167	0.9252	1.08085	0.169
20.2333	0.9252	1.08085	0.169
20.25	0.9252	1.08085	0.169
20.2667	0.9252	1.08085	0.169
20.2833	0.9252	1.08085	0.169
20.3	0.9252	1.08085	0.1664
20.3167	0.9252	1.08085	0.1664
20.3333	0.9509	1.05164	0.1664
20.35	0.9509	1.05164	0.1664
20.3667	0.9509	1.05164	0.1664
20.3833	0.9509	1.05164	0.1664
20.4	0.9509	1.05164	0.1664
20.4167	0.9509	1.05164	0.1664
20.4333	0.9509	1.05164	0.1664
20.45	0.9509	1.05164	0.1664
20.4667	0.9509	1.05164	0.1664
20.4833	0.9509	1.05164	0.1664
20.5	0.9509	1.05164	0.1664
20.5167	0.9509	1.05164	0.1664
20.5333	0.9509	1.05164	0.1638
20.55	0.9509	1.05164	0.1638
20.5667	0.9509	1.05164	0.1638
20.5833	0.9509	1.05164	0.1638
20.6	0.9509	1.05164	0.1638
20.6167	0.9766	1.02396	0.1638
20.6333	0.9766	1.02396	0.1638
20.65	0.9766	1.02396	0.1638
20.6667	0.9766	1.02396	0.1638
20.6833	0.9766	1.02396	0.1638
20.7	0.9766	1.02396	0.1638
20.7167	0.9766	1.02396	0.1638
20.7333	0.9766	1.02396	0.1638
20.75	0.9766	1.02396	0.1638
20.7667	0.9766	1.02396	0.1638
20.7833	0.9766	1.02396	0.1638
20.8	0.9766	1.02396	0.1638
20.8167	1.0023	0.997705	0.1638
20.8333	1.0023	0.997705	0.1612
20.85	1.0023	0.997705	0.1612
20.8667	1.0023	0.997705	0.1612
20.8833	1.0023	0.997705	0.1612
20.9	1.0023	0.997705	0.1612
20.9167	1.0023	0.997705	0.1612
20.9333	1.0023	0.997705	0.1612
20.95	1.0023	0.997705	0.1612
20.9667	1.0023	0.997705	0.1612
20.9833	1.0023	0.997705	0.1612
21	1.0023	0.997705	0.1612
21.0167	1.0023	0.997705	0.1612
21.0333	1.0023	0.997705	0.1612
21.05	1.0023	0.997705	0.1612
21.0667	1.0023	0.997705	0.1586
21.0833	1.0023	0.997705	0.1586
21.1	1.028	0.972763	0.1586
21.1167	1.0537	0.949037	0.1534
21.1333	1.1565	0.864678	0.1456
21.15	1.1308	0.88433	0.1482
21.1667	1.1051	0.904895	0.1508
21.1833	1.0794	0.926441	0.1534
21.2	1.0023	0.997705	0.1612
21.2167	1.0023	0.997705	0.1612
21.2333	1.1051	0.904895	0.1482
21.25	1.1051	0.904895	0.1508
21.2667	1.0794	0.926441	0.1534
21.2833	1.0537	0.949037	0.1534
21.3	1.1051	0.904895	0.1508
21.3167	1.1051	0.904895	0.1482
21.3333	1.0537	0.949037	0.1534
21.35	1.0537	0.949037	0.1534
21.3667	1.0537	0.949037	0.1534
21.3833	1.0537	0.949037	0.1534
21.4	1.0794	0.926441	0.1508
21.4167	1.0537	0.949037	0.1534
21.4333	0.9766	1.02396	0.1586
21.45	0.9766	1.02396	0.1586
21.4667	1.0023	0.997705	0.1586
21.4833	1.0023	0.997705	0.1586
21.5	1.0023	0.997705	0.1586
21.5167	1.0023	0.997705	0.156
21.5333	1.0023	0.997705	0.156
21.55	1.0023	0.997705	0.156
21.5667	1.028	0.972763	0.156
21.5833	1.028	0.972763	0.156
21.6	1.028	0.972763	0.156
21.6167	1.028	0.972763	0.156
21.6333	1.028	0.972763	0.1534
21.65	1.028	0.972763	0.1534
21.6667	1.028	0.972763	0.1534
21.6833	1.028	0.972763	0.1534
21.7	1.028	0.972763	0.1534
21.7167	1.028	0.972763	0.1534
21.7333	1.028	0.972763	0.1534
21.75	1.028	0.972763	0.1508
21.7667	1.028	0.972763	0.1508
21.7833	1.028	0.972763	0.1508
21.8	1.028	0.972763	0.1508
21.8167	1.028	0.972763	0.1508
21.8333	1.028	0.972763	0.1508
21.85	1.028	0.972763	0.1508
21.8667	1.0537	0.949037	0.1508
21.8833	1.0537	0.949037	0.1508
21.9	1.0537	0.949037	0.1508
21.9167	1.0537	0.949037	0.1482
21.9333	1.0537	0.949037	0.1482
21.95	1.0537	0.949037	0.1482
21.9667	1.0537	0.949037	0.1482
21.9833	1.0537	0.949037	0.1482
22	1.0537	0.949037	0.1482
22.0167	1.2336	0.810636	0.13
22.0333	1.1822	0.845881	0.1378
22.05	1.1565	0.864678	0.1404
22.0667	1.1308	0.88433	0.1404
22.0833	1.1308	0.88433	0.1404
22.1	1.1051	0.904895	0.1404
22.1167	1.028	0.972763	0.1508
22.1333	1.028	0.972763	0.1482
22.15	1.1822	0.845881	0.1352
22.1667	1.1308	0.88433	0.1404
22.1833	1.0794	0.926441	0.143
22.2	1.028	0.972763	0.1482
22.2167	1.028	0.972763	0.1482
22.2333	1.0537	0.949037	0.1482
22.25	1.0023	0.997705	0.1534
22.2667	1.0537	0.949037	0.1482
22.2833	1.0537	0.949037	0.1482
22.3	1.0537	0.949037	0.1456
22.3167	1.0537	0.949037	0.1456
22.3333	1.0537	0.949037	0.1456
22.35	1.0537	0.949037	0.1456
22.3667	1.0537	0.949037	0.1456
22.3833	1.0537	0.949037	0.1456
22.4	1.0794	0.926441	0.1456
22.4167	1.0794	0.926441	0.1456
22.4333	1.0794	0.926441	0.143
22.45	1.0794	0.926441	0.143
22.4667	1.0794	0.926441	0.143
22.4833	1.0794	0.926441	0.143
22.5	1.0794	0.926441	0.143
22.5167	1.0794	0.926441	0.143
22.5333	1.0794	0.926441	0.143
22.55	1.0794	0.926441	0.143
22.5667	1.0794	0.926441	0.143
22.5833	1.0794	0.926441	0.143
22.6	1.0794	0.926441	0.143
22.6167	1.0794	0.926441	0.143
22.6333	1.0794	0.926441	0.143
22.65	1.0794	0.926441	0.143
22.6667	1.0794	0.926441	0.1404
22.6833	1.0794	0.926441	0.1404
22.7	1.0794	0.926441	0.1404
22.7167	1.1051	0.904895	0.1404
22.7333	1.1051	0.904895	0.1404
22.75	1.1051	0.904895	0.1404
22.7667	1.1051	0.904895	0.1404
22.7833	1.1051	0.904895	0.1404
22.8	1.1051	0.904895	0.1404
22.8167	1.1051	0.904895	0.1404
22.8333	1.1051	0.904895	0.1404
22.85	1.1051	0.904895	0.1404
22.8667	1.1051	0.904895	0.1404
22.8833	1.1051	0.904895	0.1404
22.9	1.1051	0.904895	0.1404
22.9167	1.1051	0.904895	0.1404
22.9333	1.1051	0.904895	0.1404
22.95	1.1051	0.904895	0.1404
22.9667	1.1051	0.904895	0.1378
22.9833	1.1051	0.904895	0.1378
23	1.1051	0.904895	0.1404
23.0167	1.1051	0.904895	0.1378
23.0333	1.1051	0.904895	0.1378
23.05	1.1051	0.904895	0.1378
23.0667	1.1051	0.904895	0.1378
23.0833	1.1051	0.904895	0.1378
23.1	1.1051	0.904895	0.1378
23.1167	1.1308	0.88433	0.1378
23.1333	1.1308	0.88433	0.1378
23.15	1.1308	0.88433	0.1378
23.1667	1.1308	0.88433	0.1378
23.1833	1.1308	0.88433	0.1378
23.2	1.1308	0.88433	0.1378
23.2167	1.1308	0.88433	0.1378
23.2333	1.1308	0.88433	0.1378
23.25	1.1308	0.88433	0.1378
23.2667	1.1308	0.88433	0.1378
23.2833	1.1308	0.88433	0.1378
23.3	1.1308	0.88433	0.1378
23.3167	1.1308	0.88433	0.1378
23.3333	1.1308	0.88433	0.1352
23.35	1.1308	0.88433	0.1352
23.3667	1.1308	0.88433	0.1352
23.3833	1.1308	0.88433	0.1352
23.4	1.1308	0.88433	0.1352
23.4167	1.1308	0.88433	0.1352
23.4333	1.1308	0.88433	0.1352
23.45	1.1308	0.88433	0.1352
23.4667	1.1308	0.88433	0.1352
23.4833	1.1308	0.88433	0.1352
23.5	1.1308	0.88433	0.1352
23.5167	1.1308	0.88433	0.1352
23.5333	1.1308	0.88433	0.1352
23.55	1.1308	0.88433	0.1352
23.5667	1.1308	0.88433	0.1352
23.5833	1.1308	0.88433	0.1352
23.6	1.1308	0.88433	0.1352
23.6167	1.1308	0.88433	0.1352
23.6333	1.1308	0.88433	0.1352
23.65	1.1308	0.88433	0.1352
23.6667	1.1308	0.88433	0.1352
23.6833	1.1565	0.864678	0.1352
23.7	1.1565	0.864678	0.1352
23.7167	1.1565	0.864678	0.1326
23.7333	1.1565	0.864678	0.1326
23.75	1.1565	0.864678	0.1352
23.7667	1.1308	0.88433	0.1352
23.7833	1.1565	0.864678	0.1326
23.8	1.1565	0.864678	0.1326
23.8167	1.1565	0.864678	0.1326
23.8333	1.1565	0.864678	0.1326
23.85	1.1565	0.864678	0.1326
23.8667	1.1565	0.864678	0.1326
23.8833	1.1565	0.864678	0.1326
23.9	1.1565	0.864678	0.1326
23.9167	1.1565	0.864678	0.1326
23.9333	1.1565	0.864678	0.1326
23.95	1.1565	0.864678	0.1326
23.9667	1.1565	0.864678	0.1326
23.9833	1.1565	0.864678	0.1326
24	1.1565	0.864678	0.1326
24.0167	1.1565	0.864678	0.1326
24.0333	1.1565	0.864678	0.1326
24.05	1.1565	0.864678	0.1326
24.0667	1.1565	0.864678	0.1326
24.0833	1.1565	0.864678	0.1326
24.1	1.1565	0.864678	0.1326
24.1167	1.1565	0.864678	0.1326
24.1333	1.1565	0.864678	0.1326
24.15	1.1565	0.864678	0.1326
24.1667	1.1565	0.864678	0.1326
24.1833	1.1565	0.864678	0.1326
24.2	1.1565	0.864678	0.1326
24.2167	1.1565	0.864678	0.1326
24.2333	1.1565	0.864678	0.1326
24.25	1.1565	0.864678	0.13
24.2667	1.1565	0.864678	0.13
24.2833	1.1565	0.864678	0.13
24.3	1.1565	0.864678	0.13
24.3167	1.1565	0.864678	0.13
24.3333	1.1565	0.864678	0.13
24.35	1.1565	0.864678	0.13
24.3667	1.1565	0.864678	0.13
24.3833	1.1565	0.864678	0.13
24.4	1.1565	0.864678	0.13
24.4167	1.1565	0.864678	0.13
24.4333	1.1565	0.864678	0.13
24.45	1.1565	0.864678	0.13
24.4667	1.1565	0.864678	0.13
24.4833	1.1565	0.864678	0.13
24.5	1.1565	0.864678	0.13
24.5167	1.1565	0.864678	0.13
24.5333	1.1565	0.864678	0.13
24.55	1.1565	0.864678	0.13
24.5667	1.1565	0.864678	0.13
24.5833	1.1565	0.864678	0.13
24.6	1.1565	0.864678	0.13
24.6167	1.1565	0.864678	0.13
24.6333	1.1565	0.864678	0.13
24.65	1.1565	0.864678	0.13
24.6667	1.1565	0.864678	0.13
24.6833	1.1565	0.864678	0.13
24.7	1.1565	0.864678	0.13
24.7167	1.1565	0.864678	0.13
24.7333	1.1565	0.864678	0.13
24.75	1.1565	0.864678	0.13
24.7667	1.1565	0.864678	0.13
24.7833	1.1565	0.864678	0.13
24.8	1.1565	0.864678	0.1274
24.8167	1.1565	0.864678	0.1274
24.8333	1.1565	0.864678	0.1274
24.85	1.1565	0.864678	0.1274
24.8667	1.1565	0.864678	0.1274
24.8833	1.1565	0.864678	0.1274
24.9	1.1822	0.845881	0.1274
24.9167	1.1822	0.845881	0.1274
24.9333	1.1565	0.864678	0.1274
24.95	1.1822	0.845881	0.1274
24.9667	1.1565	0.864678	0.1274
24.9833	1.1565	0.864678	0.1274
25	1.1822	0.845881	0.1274
25.0167	1.1822	0.845881	0.1274
25.0333	1.1822	0.845881	0.1274
25.05	1.1822	0.845881	0.1274
25.0667	1.1822	0.845881	0.1274
25.0833	1.1822	0.845881	0.1274
25.1	1.1822	0.845881	0.1274
25.1167	1.1822	0.845881	0.1274
25.1333	1.1822	0.845881	0.1274
25.15	1.1822	0.845881	0.1274
25.1667	1.1822	0.845881	0.1274
25.1833	1.1822	0.845881	0.1274
25.2	1.1822	0.845881	0.1274
25.2167	1.1822	0.845881	0.1274
25.2333	1.1822	0.845881	0.1274
25.25	1.1822	0.845881	0.1274
25.2667	1.1822	0.845881	0.1274
25.2833	1.1822	0.845881	0.1274
25.3	1.1822	0.845881	0.1274
25.3167	1.1822	0.845881	0.1274
25.3333	1.1822	0.845881	0.1274
25.35	1.1822	0.845881	0.1248
25.3667	1.1822	0.845881	0.1248
25.3833	1.1822	0.845881	0.1248
25.4	1.1822	0.845881	0.1248
25.4167	1.1822	0.845881	0.1248
25.4333	1.1822	0.845881	0.1248
25.45	1.1822	0.845881	0.1248
25.4667	1.3364	0.748279	0.1118
25.4833	1.3364	0.748279	0.1118
25.5	1.285	0.77821	0.117
25.5167	1.2079	0.827883	0.1222
25.5333	1.1565	0.864678	0.1274
25.55	1.285	0.77821	0.1144
25.5667	1.2593	0.794092	0.117
25.5833	1.2336	0.810636	0.1196
25.6	1.2336	0.810636	0.1196
25.6167	1.2336	0.810636	0.1196
25.6333	1.2079	0.827883	0.1222
25.65	1.1565	0.864678	0.1274
25.6667	1.1565	0.864678	0.1274
25.6833	1.1565	0.864678	0.1274
25.7	1.1565	0.864678	0.1274
25.7167	1.1565	0.864678	0.1274
25.7333	1.1565	0.864678	0.1274
25.75	1.1822	0.845881	0.1274
25.7667	1.1822	0.845881	0.1248
25.7833	1.1822	0.845881	0.1274
25.8	1.1822	0.845881	0.1248
25.8167	1.1822	0.845881	0.1248
25.8333	1.1822	0.845881	0.1248
25.85	1.1822	0.845881	0.1248
25.8667	1.1822	0.845881	0.1248
25.8833	1.1822	0.845881	0.1248
25.9	1.1822	0.845881	0.1248
25.9167	1.3364	0.748279	0.1092
25.9333	1.2593	0.794092	0.117
25.95	1.2079	0.827883	0.1196
25.9667	1.2336	0.810636	0.117
25.9833	1.1822	0.845881	0.1222
26	1.3107	0.762951	0.1092
26.0167	1.2593	0.794092	0.1144
26.0333	1.2593	0.794092	0.1144
26.05	1.1822	0.845881	0.1248
26.0667	1.1565	0.864678	0.1248
26.0833	1.2336	0.810636	0.117
26.1	1.1051	0.904895	0.1378
26.1167	1.0537	0.949037	0.1586
26.1333	1.0023	0.997705	0.182
26.15	0.9766	1.02396	0.208
26.1667	0.8995	1.11173	0.2236
26.1833	1.0537	0.949037	0.2106
26.2	1.028	0.972763	0.2184
26.2167	1.0023	0.997705	0.221
26.2333	0.8995	1.11173	0.2314
26.25	0.8738	1.14443	0.234
26.2667	0.8995	1.11173	0.234
26.2833	0.8995	1.11173	0.2366
26.3	0.8995	1.11173	0.2366
26.3167	0.9252	1.08085	0.2392
26.3333	0.9252	1.08085	0.2418
26.35	0.9252	1.08085	0.2418
26.3667	0.9252	1.08085	0.2444
26.3833	0.9252	1.08085	0.2626
26.4	0.9252	1.08085	0.4472
26.4167	0.8995	1.11173	0.5902
26.4333	0.9252	1.08085	0.5876
26.45	0.9252	1.08085	0.585
26.4667	0.9509	1.05164	0.585
26.4833	0.9509	1.05164	0.585
26.5	0.9509	1.05164	0.585
26.5167	0.9509	1.05164	0.585
26.5333	0.9509	1.05164	0.585
26.55	0.9509	1.05164	0.585
26.5667	0.9509	1.05164	0.585
26.5833	0.9509	1.05164	0.585
26.6	0.9509	1.05164	0.585
26.6167	0.9766	1.02396	0.585
26.6333	0.9766	1.02396	0.585
26.65	0.9766	1.02396	0.585
26.6667	0.9766	1.02396	0.585
26.6833	1.0537	0.949037	0.5746
26.7	1.0794	0.926441	0.5746
26.7167	1.0537	0.949037	0.5772
26.7333	1.0023	0.997705	0.5824
26.75	0.9509	1.05164	0.5876
26.7667	0.9509	1.05164	0.5876
26.7833	0.9509	1.05164	0.585
26.8	0.9509	1.05164	0.585
26.8167	0.9766	1.02396	0.585
26.8333	0.9766	1.02396	0.585
26.85	0.9766	1.02396	0.585
26.8667	0.9766	1.02396	0.585
26.8833	0.9766	1.02396	0.585
26.9	0.9766	1.02396	0.585
26.9167	0.9766	1.02396	0.585
26.9333	0.9766	1.02396	0.585
26.95	0.9766	1.02396	0.585
26.9667	1.0023	0.997705	0.5824
26.9833	1.1565	0.864678	0.5668
27	1.0794	0.926441	0.5746
27.0167	1.0794	0.926441	0.5772
27.0333	1.0537	0.949037	0.5772
27.05	1.028	0.972763	0.5824
27.0667	0.9766	1.02396	0.585
27.0833	1.1051	0.904895	0.5746
27.1	1.0537	0.949037	0.5798
27.1167	1.0537	0.949037	0.5798
27.1333	1.0537	0.949037	0.5798
27.15	1.028	0.972763	0.5798
27.1667	0.9509	1.05164	0.5876
27.1833	0.9509	1.05164	0.5876
27.2	0.9766	1.02396	0.5876
27.2167	0.9766	1.02396	0.585
27.2333	0.9766	1.02396	0.585
27.25	0.9766	1.02396	0.585
27.2667	1.0537	0.949037	0.5772
27.2833	1.1308	0.88433	0.572
27.3	1.0794	0.926441	0.5772
27.3167	1.028	0.972763	0.5824
27.3333	1.0794	0.926441	0.5746
27.35	1.028	0.972763	0.5824
27.3667	0.9509	1.05164	0.5876
27.3833	0.9766	1.02396	0.5876
27.4	0.9766	1.02396	0.5876
27.4167	0.9766	1.02396	0.5876
27.4333	0.9766	1.02396	0.5876
27.45	0.9766	1.02396	0.5876
27.4667	0.9766	1.02396	0.5876
27.4833	0.9766	1.02396	0.585
27.5	0.9766	1.02396	0.585
27.5167	0.9766	1.02396	0.585
27.5333	0.9766	1.02396	0.585
27.55	0.9766	1.02396	0.585
27.5667	0.9766	1.02396	0.585
27.5833	0.9766	1.02396	0.585
27.6	0.9766	1.02396	0.585
27.6167	0.9766	1.02396	0.585
27.6333	0.9766	1.02396	0.585
27.65	0.9766	1.02396	0.585
27.6667	0.9766	1.02396	0.585
27.6833	1.0023	0.997705	0.585
27.7	1.0023	0.997705	0.585
27.7167	1.0023	0.997705	0.585
27.7333	1.0023	0.997705	0.585
27.75	1.0023	0.997705	0.585
27.7667	1.0023	0.997705	0.585
27.7833	1.0023	0.997705	0.585
27.8	1.0023	0.997705	0.5824
27.8167	1.0023	0.997705	0.585
27.8333	1.0023	0.997705	0.585
27.85	1.0023	0.997705	0.5824
27.8667	1.0023	0.997705	0.585
27.8833	1.0023	0.997705	0.585
27.9	1.0023	0.997705	0.5824
27.9167	1.0023	0.997705	0.585
27.9333	1.0023	0.997705	0.5824
27.95	1.0023	0.997705	0.585
27.9667	1.0023	0.997705	0.585
27.9833	1.0023	0.997705	0.585
28	1.0023	0.997705	0.5824
28.0167	1.0023	0.997705	0.5824
28.0333	1.0023	0.997705	0.5824
28.05	1.0023	0.997705	0.5824
28.0667	1.0023	0.997705	0.5824
28.0833	1.0023	0.997705	0.5824
28.1	1.0023	0.997705	0.585
28.1167	1.0023	0.997705	0.585
28.1333	1.0023	0.997705	0.5824
28.15	1.0023	0.997705	0.5824
28.1667	1.0023	0.997705	0.5824
28.1833	1.0023	0.997705	0.5824
28.2	1.0023	0.997705	0.5824
28.2167	1.0023	0.997705	0.5824
28.2333	1.0023	0.997705	0.5824
28.25	1.0023	0.997705	0.5824
28.2667	1.0023	0.997705	0.5824
28.2833	1.0023	0.997705	0.5824
28.3	1.0023	0.997705	0.5824
28.3167	1.0023	0.997705	0.5824
28.3333	1.0023	0.997705	0.5824
28.35	1.0023	0.997705	0.5824
28.3667	1.0023	0.997705	0.5824
28.3833	1.0023	0.997705	0.5824
28.4	1.0023	0.997705	0.5824
28.4167	1.0023	0.997705	0.5824
28.4333	1.0023	0.997705	0.5824
28.45	1.0023	0.997705	0.5824
28.4667	1.0023	0.997705	0.5824
28.4833	1.0023	0.997705	0.5824
28.5	1.0023	0.997705	0.5824
28.5167	1.0023	0.997705	0.5824
28.5333	1.0023	0.997705	0.5824
28.55	1.0023	0.997705	0.5824
28.5667	1.0023	0.997705	0.5824
28.5833	0.9766	1.02396	0.5824
28.6	0.9766	1.02396	0.5824
28.6167	0.9766	1.02396	0.5824
28.6333	0.9766	1.02396	0.5824
28.65	0.9766	1.02396	0.5824
28.6667	0.9766	1.02396	0.5824
28.6833	0.9766	1.02396	0.5824
28.7	0.9509	1.05164	0.5824
28.7167	0.9509	1.05164	0.5824
28.7333	0.9509	1.05164	0.5824
28.75	0.9509	1.05164	0.5824
28.7667	0.9509	1.05164	0.5824
28.7833	0.9509	1.05164	0.5824
28.8	0.9252	1.08085	0.5824
28.8167	0.9252	1.08085	0.5824
28.8333	0.9252	1.08085	0.5824
28.85	0.9252	1.08085	0.5824
28.8667	0.9252	1.08085	0.5824
28.8833	0.9252	1.08085	0.5824
28.9	0.9252	1.08085	0.5824
28.9167	0.9252	1.08085	0.5824
28.9333	0.9252	1.08085	0.5824
28.95	0.9252	1.08085	0.5824
28.9667	0.8995	1.11173	0.5824
28.9833	0.8995	1.11173	0.5824
29	0.8995	1.11173	0.5824
29.0167	0.8995	1.11173	0.5824
29.0333	0.8995	1.11173	0.5824
29.05	0.8995	1.11173	0.5824
29.0667	0.8995	1.11173	0.5824
29.0833	0.8738	1.14443	0.5824
29.1	0.8738	1.14443	0.5824
29.1167	0.8738	1.14443	0.5824
29.1333	0.8738	1.14443	0.5824
29.15	0.8738	1.14443	0.5824
29.1667	0.8738	1.14443	0.5824
29.1833	0.8481	1.17911	0.5824
29.2	0.8481	1.17911	0.5824
29.2167	0.8481	1.17911	0.5824
29.2333	0.8481	1.17911	0.5824
29.25	0.8481	1.17911	0.5824
29.2667	0.8481	1.17911	0.5824
29.2833	0.8481	1.17911	0.5824
29.3	0.8481	1.17911	0.5824
29.3167	0.8481	1.17911	0.5824
29.3333	0.8481	1.17911	0.5824
29.35	0.8481	1.17911	0.5824
29.3667	0.8481	1.17911	0.5824
29.3833	0.8481	1.17911	0.5824
29.4	0.8481	1.17911	0.5824
29.4167	0.8481	1.17911	0.5798
29.4333	1.0537	0.949037	0.5616
29.45	0.9766	1.02396	0.5694
29.4667	0.9252	1.08085	0.572
29.4833	0.9252	1.08085	0.5746
29.5	0.8995	1.11173	0.5746
29.5167	0.8995	1.11173	0.5746
29.5333	0.8995	1.11173	0.5746
29.55	0.8995	1.11173	0.5772
29.5667	0.8481	1.17911	0.5824
29.5833	0.8738	1.14443	0.5772
29.6	0.8995	1.11173	0.5772
29.6167	0.8738	1.14443	0.5772
29.6333	0.8738	1.14443	0.5772
29.65	0.8738	1.14443	0.5772
29.6667	0.8738	1.14443	0.5772
29.6833	0.8738	1.14443	0.5772
29.7	0.7967	1.25518	0.585
29.7167	0.771	1.29702	0.5876
29.7333	0.7967	1.25518	0.585
29.75	0.7967	1.25518	0.585
29.7667	0.7967	1.25518	0.585
29.7833	0.7967	1.25518	0.585
29.8	0.7967	1.25518	0.585
29.8167	0.7967	1.25518	0.585
29.8333	0.8224	1.21595	0.585
29.85	0.7967	1.25518	0.585
29.8667	0.7967	1.25518	0.585
29.8833	0.7967	1.25518	0.585
29.9	0.8224	1.21595	0.585
29.9167	0.8224	1.21595	0.585
29.9333	0.8224	1.21595	0.585
29.95	0.7967	1.25518	0.585
29.9667	0.8224	1.21595	0.585
29.9833	0.7967	1.25518	0.585
30	0.7967	1.25518	0.5824
30.0167	0.7967	1.25518	0.5824
30.0333	0.8224	1.21595	0.5824
30.05	0.8224	1.21595	0.5824
30.0667	0.8224	1.21595	0.5824
30.0833	0.8224	1.21595	0.5824
30.1	0.8224	1.21595	0.5824
30.1167	0.7967	1.25518	0.5824
30.1333	0.8224	1.21595	0.5824
30.15	0.7967	1.25518	0.5824
30.1667	0.7967	1.25518	0.5824
30.1833	0.7967	1.25518	0.5824
30.2	0.7967	1.25518	0.5824
30.2167	0.7967	1.25518	0.5824
30.2333	0.7967	1.25518	0.5824
30.25	0.7967	1.25518	0.5824
30.2667	0.7967	1.25518	0.5824
30.2833	0.7967	1.25518	0.5824
30.3	0.7967	1.25518	0.5824
30.3167	0.7967	1.25518	0.5824
30.3333	0.7967	1.25518	0.5824
30.35	0.7967	1.25518	0.5824
30.3667	0.7967	1.25518	0.5824
30.3833	0.7967	1.25518	0.5824
30.4	0.7967	1.25518	0.5824
30.4167	0.7967	1.25518	0.5824
30.4333	0.7967	1.25518	0.5824
30.45	0.7967	1.25518	0.5824
30.4667	0.7967	1.25518	0.5824
30.4833	0.7967	1.25518	0.5824
30.5	0.7967	1.25518	0.5824
30.5167	0.7967	1.25518	0.5824
30.5333	0.7967	1.25518	0.5824
30.55	0.7967	1.25518	0.5824
30.5667	0.7967	1.25518	0.5824
30.5833	0.7967	1.25518	0.5824
30.6	0.7967	1.25518	0.5824
30.6167	0.7967	1.25518	0.5824
30.6333	0.7967	1.25518	0.5824
30.65	0.7967	1.25518	0.5824
30.6667	0.7967	1.25518	0.5824
30.6833	0.7967	1.25518	0.5824
30.7	0.7967	1.25518	0.5798
30.7167	0.7967	1.25518	0.5824
30.7333	0.7967	1.25518	0.5798
30.75	0.7967	1.25518	0.5824
30.7667	0.7967	1.25518	0.5798
30.7833	0.7967	1.25518	0.5824
30.8	0.7967	1.25518	0.5824
30.8167	0.7967	1.25518	0.5824
30.8333	0.7967	1.25518	0.5798
30.85	0.7967	1.25518	0.5798
30.8667	0.7967	1.25518	0.5798
30.8833	0.7967	1.25518	0.5798
30.9	0.7967	1.25518	0.5798
30.9167	0.7967	1.25518	0.5798
30.9333	0.7967	1.25518	0.5798
30.95	0.7967	1.25518	0.5798
30.9667	0.7967	1.25518	0.5798
30.9833	0.7967	1.25518	0.5798
31	0.7967	1.25518	0.5798
31.0167	0.7967	1.25518	0.5824
31.0333	0.7967	1.25518	0.5798
31.05	0.7967	1.25518	0.5798
31.0667	0.7967	1.25518	0.5798
31.0833	0.7967	1.25518	0.5798
31.1	0.7967	1.25518	0.5798
31.1167	0.7967	1.25518	0.5798
31.1333	0.7967	1.25518	0.5798
31.15	0.7967	1.25518	0.5798
31.1667	0.7967	1.25518	0.5798
31.1833	0.771	1.29702	0.5798
31.2	0.771	1.29702	0.5798
31.2167	0.771	1.29702	0.5798
31.2333	0.771	1.29702	0.5798
31.25	0.771	1.29702	0.5798
31.2667	0.771	1.29702	0.5798
31.2833	0.771	1.29702	0.5798
31.3	0.771	1.29702	0.5824
31.3167	0.771	1.29702	0.5824
31.3333	0.771	1.29702	0.5824
31.35	0.771	1.29702	0.5798
31.3667	0.771	1.29702	0.5798
31.3833	0.771	1.29702	0.5824
31.4	0.771	1.29702	0.5824
31.4167	0.771	1.29702	0.5798
31.4333	0.771	1.29702	0.5824
31.45	0.7453	1.34174	0.5824
31.4667	0.7453	1.34174	0.5824
31.4833	0.7453	1.34174	0.5798
31.5	0.7453	1.34174	0.5798
31.5167	0.7453	1.34174	0.5798
31.5333	0.7453	1.34174	0.5824
31.55	0.7453	1.34174	0.5824
31.5667	0.7453	1.34174	0.5824
31.5833	0.7453	1.34174	0.5824
31.6	0.7453	1.34174	0.5824
31.6167	0.7453	1.34174	0.5798
31.6333	0.7453	1.34174	0.5798
31.65	0.7453	1.34174	0.5798
31.6667	0.7453	1.34174	0.5798
31.6833	0.7453	1.34174	0.5798
31.7	0.7453	1.34174	0.5824
31.7167	0.7453	1.34174	0.5824
31.7333	0.7453	1.34174	0.5824
31.75	0.7453	1.34174	0.5824
31.7667	0.7453	1.34174	0.5798
31.7833	0.7453	1.34174	0.5798
31.8	0.7453	1.34174	0.5798
31.8167	0.7453	1.34174	0.5798
31.8333	0.7453	1.34174	0.5798
31.85	0.7453	1.34174	0.5798
31.8667	0.7453	1.34174	0.5798
31.8833	0.7453	1.34174	0.5824
31.9	0.7453	1.34174	0.5824
31.9167	0.7453	1.34174	0.5824
31.9333	0.7453	1.34174	0.5824
31.95	0.7453	1.34174	0.5824
31.9667	0.7453	1.34174	0.5798
31.9833	0.7453	1.34174	0.5824
32	0.7453	1.34174	0.5824
32.0167	0.7453	1.34174	0.5824
32.0333	0.7453	1.34174	0.5798
32.05	0.7453	1.34174	0.5798
32.0667	0.7453	1.34174	0.5824
32.0833	0.7453	1.34174	0.5798
32.1	0.7453	1.34174	0.5824
32.1167	0.7453	1.34174	0.5798
32.1333	0.7453	1.34174	0.5798
32.15	0.7453	1.34174	0.5824
32.1667	0.7453	1.34174	0.5798
32.1833	0.7453	1.34174	0.5798
32.2	0.7196	1.38966	0.5798
32.2167	0.7196	1.38966	0.5824
32.2333	0.7196	1.38966	0.5824
32.25	0.7196	1.38966	0.5824
32.2667	0.7196	1.38966	0.5824
32.2833	0.7196	1.38966	0.5824
32.3	0.7196	1.38966	0.5798
32.3167	0.7196	1.38966	0.5798
32.3333	0.7196	1.38966	0.5798
32.35	0.7196	1.38966	0.5798
32.3667	0.7196	1.38966	0.5798
32.3833	0.7196	1.38966	0.5824
32.4	0.7196	1.38966	0.5798
32.4167	0.7196	1.38966	0.5798
32.4333	0.7196	1.38966	0.5798
32.45	0.7196	1.38966	0.5798
32.4667	0.7196	1.38966	0.5824
32.4833	0.7196	1.38966	0.5824
32.5	0.7196	1.38966	0.5824
32.5167	0.7196	1.38966	0.5798
32.5333	0.7196	1.38966	0.5798
32.55	0.7196	1.38966	0.5798
32.5667	0.7196	1.38966	0.5824
32.5833	0.7196	1.38966	0.5824
32.6	0.7196	1.38966	0.5824
32.6167	0.7196	1.38966	0.5824
32.6333	0.7196	1.38966	0.5824
32.65	0.7196	1.38966	0.5798
32.6667	0.7196	1.38966	0.5798
32.6833	0.7196	1.38966	0.5798
32.7	0.7196	1.38966	0.5798
32.7167	0.7196	1.38966	0.5798
32.7333	0.7196	1.38966	0.5798
32.75	0.7196	1.38966	0.5798
32.7667	0.7196	1.38966	0.5798
32.7833	0.7196	1.38966	0.5798
32.8	0.7196	1.38966	0.5798
32.8167	0.9509	1.05164	0.559
32.8333	0.8224	1.21595	0.5694
32.85	0.7967	1.25518	0.572
32.8667	0.771	1.29702	0.5746
32.8833	0.771	1.29702	0.5746
32.9	0.7196	1.38966	0.5798
32.9167	0.7196	1.38966	0.5798
32.9333	0.7967	1.25518	0.572
32.95	0.7453	1.34174	0.5746
32.9667	0.7453	1.34174	0.5772
32.9833	0.7453	1.34174	0.5772
33	0.7453	1.34174	0.5772
33.0167	0.7453	1.34174	0.5772
33.0333	0.7453	1.34174	0.5772
33.055	0.7453	1.34174	0.5772
33.0667	0.7196	1.38966	0.5798
33.0833	0.6682	1.49656	0.585
33.1	0.6682	1.49656	0.585
33.1167	0.6682	1.49656	0.585
33.1333	0.6682	1.49656	0.5824
33.15	0.6682	1.49656	0.5824
33.1667	0.6682	1.49656	0.5824
33.1833	0.6682	1.49656	0.5824
33.2	0.6682	1.49656	0.5824
33.2167	0.6939	1.44113	0.5824
33.2333	0.6939	1.44113	0.5824
33.25	0.6939	1.44113	0.5824
33.2667	0.6939	1.44113	0.5824
33.2833	0.6939	1.44113	0.5824
33.3	0.6939	1.44113	0.5824
[truncated: 344 more rows]
